# Supplementary material
Source: ML conference proceedings conference paper supplement (https://proceedings.mlr.press/v54/zhong17a.html)
Supplement: Supplementary file [file zhong17a-supp.pdf]

# Appendix

## A Proofs

We introduce some lemmata here, whose proofs can be found in the following sections.

**Lemma 6** (Approximation error between sign and tanh). *Under Assumption 1, w.p.  $1 - C_1 r \theta$*

$$|\tilde{f}_{W^*, B^*}(\mathbf{x}) - f_{W^*, B^*}(\mathbf{x})| \leq 8re^{-2\gamma\theta}$$

By taking  $\theta = \delta/(C_1 r)$ , we have w.p.,  $1 - \delta$

$$|\tilde{f}_{W^*, B^*}(\mathbf{x}) - f_{W^*, B^*}(\mathbf{x})| \leq 8re^{-2\gamma\delta/(C_1 r)}$$

**Lemma 7** (Lemma 2 in [12]). *If  $W \in \mathbb{R}^{r \times d}$  is a random matrix, whose entries are sampled from  $\mathcal{N}(0, 1)$  i.i.d. and  $\|\mathbf{x}\| = \|\mathbf{x}'\| = 1$ , then w.p.  $1 - 2e^{-2\epsilon^2 r}$ ,*

$$\left| \frac{1}{r} \rho_H(\text{sign}(W\mathbf{x}), \text{sign}(W\mathbf{x}')) - \rho(\mathbf{x}, \mathbf{x}') \right| \leq \epsilon \quad (18)$$

where  $\rho(\cdot, \cdot)$  is the Euclidean distance.

**Lemma 8** (Covering Spheres with Spheres. Corollary 1.2 in [5]). *For any  $0 < \phi \leq \arccos(\frac{1}{\sqrt{d+1}})$ , a sphere  $\mathcal{S}^{d-1}$  can be covered by*

$$\frac{C_2 d^{3/2}}{\sin^{d-1} \phi} \ln(d)$$

spherical balls of radius  $\phi$ , where  $C_2$  is a global constant.

### A.1 Proof of Proposition 1

*Proof.* We use Lemma 7 to prove this lemma. There are  $mN$  data pairs  $\{\mathbf{x}_i, \mathbf{c}_{y,p}\}$  for  $i \in [N]$ ,  $y \in \mathcal{Y}$  and  $p \in [m_y]$ . Then, w.p.  $1 - 2mNe^{-2\epsilon^2 r}$ , Eq. (18) holds for all the pairs. Set  $2mNe^{-2\epsilon^2 r} \leq \delta$ . Then if  $r \geq \frac{\log(2mN/\delta)}{2\epsilon^2}$ , for all  $i \in [N]$ ,  $y \in \mathcal{Y}$  and  $p \in [m_y]$ , w.p.  $1 - \delta$ ,

$$\left| \frac{1}{r} \rho_H(\text{sign}(W\mathbf{x}_i), \text{sign}(W\mathbf{c}_{y,p})) - \rho(\mathbf{x}_i, \mathbf{c}_{y,p}) \right| \leq \epsilon. \quad (19)$$

Setting  $\epsilon = \mu/4$  and applying the second assumption completes the proof.  $\square$

### A.2 Proof of Theorem 1

First, by setting  $\alpha = \nu = 32N^{-\frac{1}{16d^2}}$  and  $\xi = O(N^{-\frac{1}{32d}})$  for large enough  $N$  such that  $\xi \leq 1/2$ , Lemma 3 requires  $r \geq \frac{Cd^{3/2} \log d}{2d} N^{\frac{1}{16d}}$  and  $\gamma \geq 16$ . Setting  $\delta = N^{-\frac{1}{32d}}$ , Lemma 1 requires  $\gamma \geq C_1(d)N^{\frac{3}{32d}}$  for some constant  $C_1(d)$  depending on  $d$ . For Lemma 4, we set  $t = N^{-\frac{1}{32d}}$ . Finally, by setting  $\xi = C_2(d)N^{-\frac{1}{32d}}$  for some constant  $C_2(d)$  depending  $d$  and  $\beta$ , Eq. (13) in Lemma 2 and Eq. (15) in Lemma 3 will hold for  $\epsilon = N^{-\frac{1}{32d}}$ . By now we have shown that when  $N$  goes to  $\infty$ , the probabilities of Lemma 2 and Lemma 4 will go to 1 and the errors in the lemmata from Lemma 1 to Lemma 5 will go to zero. So we complete the proof.

### A.3 Proof of Lemma 1

*Proof.*

$$\begin{aligned} & |\mathbb{E}[\mathbb{1}[yf_{W^*, B^*}(\mathbf{x}) < 0]] - \mathbb{E}[\mathbb{1}[y\tilde{f}_{W^*, B^*}(\mathbf{x}) < 0]]| \\ &= |\mathbb{E}[\mathbb{1}[yf_{W^*, B^*}(\mathbf{x}) < 0] - \mathbb{1}[y\tilde{f}_{W^*, B^*}(\mathbf{x}) < 0]]| \end{aligned} \quad (20)$$

Note that  $f_{W^*, B^*}(\mathbf{x})$  can only take values in  $\{-2r - \nu, -2r + 1 - \nu, \dots, -1 - \nu, -\nu, 1 - \nu, \dots, 2r - \nu\}$ . So if we can show  $|f_{W^*, B^*}(\mathbf{x}) - \tilde{f}_{W^*, B^*}(\mathbf{x})| \leq \frac{\nu}{4}$ , then  $f_{W^*, B^*}(\mathbf{x})$  and  $\tilde{f}_{W^*, B^*}(\mathbf{x})$  will have the same sign, and  $\mathbb{1}[yf_{W^*, B^*}(\mathbf{x}) < 0] - \mathbb{1}[y\tilde{f}_{W^*, B^*}(\mathbf{x}) < 0] = 0$ .

According to Lemma 6 with  $\gamma \geq \frac{C_1 r}{2\delta} \log(\frac{32r}{\nu})$ , we have  $|f_{W^*, B^*}(\mathbf{x}) - \tilde{f}_{W^*, B^*}(\mathbf{x})| \leq \frac{\nu}{4}$ , w.p. at least  $1 - \delta$ .

Therefore, we obtain

$$|\mathbb{E}[\mathbb{1}[yf_{W^*, B^*}(\mathbf{x}) < 0]] - \mathbb{E}[\mathbb{1}[y\tilde{f}_{W^*, B^*}(\mathbf{x}) < 0]]| \leq \delta \quad (21)$$

$\square$

### A.4 Proof of Lemma 2

*Proof.* We use the Rademacher complexity to bound this quantity. First, let's apply Theorem 3.1 in [20], given  $\epsilon > 0$ ,

$$\begin{aligned} & \mathbb{P}[\sup_{W, B} |\mathbb{E}[\Phi(y\tilde{f}_{W, B}(\mathbf{x}))] - \hat{\mathbb{E}}[\Phi(y\tilde{f}_{W, B}(\mathbf{x}))]| \\ & > \mathcal{R}_N(\Phi \circ \mathcal{F}_{W, B}) + \epsilon] \leq e^{-N\epsilon^2/C_3}, \end{aligned} \quad (22)$$

where  $\mathcal{F}_{W, B}$  is the collection of functions formed by  $\tilde{f}_{W, B}$  and  $\mathcal{R}_N$  is the conditional Rademacher average. Since  $\Phi$  is  $\frac{1}{\alpha\xi}$ -Lipschitz and  $\tilde{f}_{W, B}$  is  $2r\gamma$ -Lipschitz, by Lemma 5.2, Lemma 5.4 in [9] ( $\tilde{f}_{W, B}$  can be scaled such that the condition of Lemma 5.4 is satisfied) and the Talagrand's contraction lemma [17], we have

$$\begin{aligned} \mathcal{R}_N(\Phi \circ \mathcal{F}_{W, B}) &\leq \frac{1}{\alpha\xi} \mathcal{R}_N(\mathcal{F}_{W, B}) \\ &\leq \frac{1}{\alpha\xi} \inf_{\epsilon > 0} \left( \epsilon + \sqrt{\frac{2(32r\gamma)^{2d} \log(8/\epsilon)}{N}} \right) \\ &\leq \frac{2^{(2d+3)/(2d+2)} (32r\gamma)^{2d/(2d+2)}}{\alpha\xi N^{1/2d+2}} \sqrt{\log(8/\epsilon)}, \end{aligned} \quad (23)$$

where  $\kappa = \frac{2^{1/(2d+2)} (32r\gamma)^{2d/(2d+2)}}{\alpha\xi N^{1/(2d+2)}}$ . As long as  $\kappa < \frac{1}{4}$ , we have  $\sqrt{\log(8/\kappa)} \leq 1/\sqrt{\kappa}$ . Therefore,  $\mathcal{R}_N(\Phi \circ \mathcal{F}_{W, B}) \leq 2\sqrt{\kappa}$ . We finish the proof by setting  $2\sqrt{\kappa} \leq \epsilon$ .  $\square$

### A.5 Proof of Lemma 3

*Proof.* We decompose

$$\hat{\mathbb{E}}[\Phi(y\tilde{f}_{W^*, B^*}(\mathbf{x}))] - \hat{\mathbb{E}}_\beta[\Phi(yf_{2\alpha}^*(\mathbf{x}))] \quad (24a)$$

$$= \hat{\mathbb{E}}[\Phi(y\tilde{f}_{W^*, B^*}(\mathbf{x}))] - \hat{\mathbb{E}}[\Phi(y\tilde{f}_{\tilde{W}, \tilde{B}}(\mathbf{x}))] \quad (24b)$$

$$+ \hat{\mathbb{E}}[\Phi(y\tilde{f}_{\tilde{W}, \tilde{B}}(\mathbf{x}))] - \hat{\mathbb{E}}_\beta[\Phi(y\tilde{f}_{\tilde{W}, \tilde{B}}(\mathbf{x}))] \quad (24c)$$

$$+ \hat{\mathbb{E}}_\beta[\Phi(y\tilde{f}_{\tilde{W}, \tilde{B}}(\mathbf{x}))] - \hat{\mathbb{E}}_\beta[\Phi(yf_{2\alpha}^*(\mathbf{x}))] \quad (24d)$$

where  $\tilde{W}, \tilde{B}$  will be defined later.

Eq. (24b) is less than zero because of the definition of  $W^*, B^*$ .

Eq. (24c) can be further decomposed into

$$\hat{\mathbb{E}}[\Phi(y\tilde{f}_{\tilde{W},\tilde{B}})] - \hat{\mathbb{E}}_\beta[\Phi(y\tilde{f}_{\tilde{W},\tilde{B}})] \quad (25a)$$

$$= \hat{\mathbb{E}}[\Phi(y\tilde{f}_{\tilde{W},\tilde{B}})] - \mathbb{E}[\Phi(y\tilde{f}_{\tilde{W},\tilde{B}})] \quad (25b)$$

$$+ \mathbb{E}[\Phi(y\tilde{f}_{\tilde{W},\tilde{B}})] - \hat{\mathbb{E}}_\beta[\Phi(y\tilde{f}_{\tilde{W},\tilde{B}})] \quad (25c)$$

Since Lemma 2 holds for any  $W, B$ , if Eq. (13) holds, w.p.  $1 - e^{-N\epsilon^2/C_3}$ ,

$$|\hat{\mathbb{E}}[\Phi(y\tilde{f}_{\tilde{W},\tilde{B}})] - \mathbb{E}[\Phi(y\tilde{f}_{\tilde{W},\tilde{B}})]| \leq 2\epsilon,$$

For the second term, we need to slightly modify this bound as we have  $\beta N$  data points rather than  $N$ . It can be presented as, if  $\epsilon$  satisfies

$$\frac{2^{1+1/(4d+4)}(32r\gamma)^{d/(2d+2)}}{\sqrt{\alpha\xi}(\beta N)^{1/(4d+4)}} < \epsilon < 1, \quad (26)$$

we have w.p.  $1 - e^{-\beta N\epsilon^2/C_3}$

$$|\mathbb{E}[\Phi(y\tilde{f}_{\tilde{W},\tilde{B}}(\mathbf{x}))] - \hat{\mathbb{E}}_\beta[\Phi(y\hat{f}_{\tilde{W},\tilde{B}}(\mathbf{x}))]| \leq 2\epsilon, \quad (27)$$

where  $C_3$  is a constant. So now we can bound Eq. (24c) by  $4\epsilon$  w.p.  $1 - 2e^{-\beta N\epsilon^2/C_3}$  given that Eq. (15) holds for  $\epsilon$ .

Next we show that given the conditions in the lemma, Eq. (24d) will be less than zero. Define  $\tilde{S} \subset \Omega_\beta$ ,

$$\tilde{S} := \{\mathbf{x}_i \in \Omega_\beta | y_i f_{2\alpha}^*(\mathbf{x}_i) \geq \alpha(1 - \xi)\}.$$

Then

$$\begin{aligned} \hat{\mathbb{E}}_\beta[\Phi(yf_{2\alpha}^*(\mathbf{x}))] &= \frac{1}{|\Omega_\beta|} \sum_{\mathbf{x}_i \in \Omega_\beta} \Phi(y_i f_{2\alpha}^*(\mathbf{x}_i)) \\ &\geq \frac{1}{|\Omega_\beta|} \sum_{\mathbf{x}_i \in \Omega_\beta} \mathbb{1}[y_i f_{2\alpha}^*(\mathbf{x}_i) < \alpha(1 - \xi)] \\ &= \frac{1}{|\Omega_\beta|} \sum_{\mathbf{x}_i \in \Omega_\beta} (1 - \mathbb{1}[y_i f_{2\alpha}^*(\mathbf{x}_i) \geq \alpha(1 - \xi)]) \\ &\geq 1 - \frac{|\tilde{S}|}{\beta N} \end{aligned} \quad (28)$$

By the definition of  $\Phi$ , we also have

$$\hat{\mathbb{E}}_\beta[\Phi(y\tilde{f}_{\tilde{W},\tilde{B}}(\mathbf{x}))] \leq \hat{\mathbb{E}}_\beta[\mathbb{1}[y\tilde{f}_{\tilde{W},\tilde{B}}(\mathbf{x}) < \alpha]] \quad (29)$$

So in the following we will show that under the condition given in the lemma, there exists a pair of  $\tilde{W}$  and  $\tilde{B}$  such that

$$\hat{\mathbb{E}}_\beta[\mathbb{1}[y\hat{f}_{\tilde{W},\tilde{B}}(\mathbf{x}) < \alpha]] \leq 1 - \frac{|\tilde{S}|}{\beta N} \quad (30)$$

Define

$$\tilde{S}^+ := \{\mathbf{x}_i \in \tilde{S} | y_i = 1, f_{2\alpha}(\mathbf{x}_i) \geq \alpha(1 - \xi)\}$$

and

$$\tilde{S}^- := \{\mathbf{x}_i \in \tilde{S} | y_i = -1, f_{2\alpha}(\mathbf{x}_i) \leq -\alpha(1 - \xi)\}.$$

Therefore,  $\tilde{S} = \tilde{S}^+ \cup \tilde{S}^-$ . Now given any  $\mathbf{x}_i \in \tilde{S}^+$  and  $\mathbf{x}_j \in \tilde{S}^-$ ,  $f_{2\alpha}^* \in \mathcal{F}_2$  implies

$$\|\mathbf{x}_i - \mathbf{x}_j\| \geq |f_{2\alpha}(\mathbf{x}_i) - f_{2\alpha}(\mathbf{x}_j)|/2 \geq \alpha(1 - \xi).$$

For some small  $\tau > 0$ , set  $r = C_2 d^{3/2} \log(d)/\tau^{d-1}$ . According to Lemma 8, the sphere  $\mathcal{S}^{d-1}$  can be covered by  $r$  spherical balls with radius  $\arcsin \tau$ . Let  $\{\mathbf{w}_k\}_{k \in [r]}$  be the centers of these spherical balls. Then for any  $\mathbf{x}_i \in \mathcal{S}^{d-1}$ , there exists a  $\mathbf{w}_k$ , such that  $\|\mathbf{w}_k - \mathbf{x}_i\| \leq 2\tau$ . Set  $\tilde{W} = [\mathbf{w}_1, \mathbf{w}_2, \dots, \mathbf{w}_K]^T$

Let  $\tilde{B} = \text{sign}(\tilde{W}\tilde{S})$ , i.e.,  $\tilde{B} = \{\text{sign}(\tilde{W}\mathbf{x}) | \mathbf{x} \in \tilde{S}\}$  and the labels of  $\tilde{B}$  follows the corresponding  $\mathbf{x}$ . Note that the size of  $\tilde{B}$  is less than  $\beta N$ , but is in order of  $O(\beta N)$ , so for simplicity, we set  $m = \beta N$ . Let  $\tilde{B}^+ = \text{sign}(\tilde{W}\tilde{S}^+)$  and  $\tilde{B}^- = \text{sign}(\tilde{W}\tilde{S}^-)$ .

$$\begin{aligned} &\hat{\mathbb{E}}_\beta[\mathbb{1}[y\hat{f}_{\tilde{W},\tilde{B}}(\mathbf{x}) < \alpha]] \\ &= \frac{1}{|\Omega_\beta|} \sum_{\mathbf{x}_i \in \Omega_\beta} \mathbb{1}[y_i \tilde{f}_{\tilde{W},\tilde{B}}(\mathbf{x}_i) < \alpha] \\ &\leq 1 - \frac{|\tilde{S}|}{\beta N} + \frac{1}{\beta N} \sum_{\mathbf{x}_i \in \tilde{S}} \mathbb{1}[y_i \tilde{f}_{\tilde{W},\tilde{B}}(\mathbf{x}_i) < \alpha] \end{aligned} \quad (31)$$

We are now going to show  $y_i \tilde{f}_{\tilde{W},\tilde{B}}(\mathbf{x}_i) \geq \alpha$  holds for all  $\mathbf{x}_i \in \tilde{S}$ . We now just consider the case when  $y_i = 1$  and the case for  $y_i = -1$  is similar. For  $\mathbf{x}_i \in \tilde{S}^+$ .

$$\begin{aligned} &\tilde{f}_{\tilde{W},\tilde{B}}(\mathbf{x}_i) \\ &= \max_{j \in \tilde{B}^+} \left( \tanh(\gamma \tilde{W} \mathbf{x}_i)^T \mathbf{b}_j \right) - \max_{j \in \tilde{B}^-} \left( \tanh(\gamma \tilde{W} \mathbf{x}_i)^T \mathbf{b}_j \right) - \nu \\ &\geq \tanh(\gamma \tilde{W} \mathbf{x}_i)^T \text{sign}(\tilde{W} \mathbf{x}_i) - \tanh(\gamma \tilde{W} \mathbf{x}_i)^T \text{sign}(\tilde{W} \mathbf{x}_{j_-}^*) - \nu \\ &\geq \tanh(\gamma \tilde{W} \mathbf{x}_i)^T \left( \text{sign}(\tilde{W} \mathbf{x}_i) - \text{sign}(\tilde{W} \mathbf{x}_{j_-}^*) \right) - \nu \end{aligned} \quad (32)$$

where  $j_-^* = \arg \max_{j \in \tilde{B}^-} \left( \tanh(\gamma \tilde{W} \mathbf{x}_i)^T \mathbf{b}_j \right)$ . For any  $k \in [r]$ , we have

$$\tanh(\gamma \mathbf{w}_k^T \mathbf{x}_i) \left( \text{sign}(\mathbf{w}_k^T \mathbf{x}_i) - \text{sign}(\mathbf{w}_k^T \mathbf{x}_{j_-^*}) \right) \geq 0$$

Let

$$k^* = \arg \min_{k \in [r]} \left\{ \left\| \mathbf{w}_k - \frac{\mathbf{x}_i - \mathbf{x}_{j_-^*}}{\|\mathbf{x}_i - \mathbf{x}_{j_-^*}\|} \right\| \right\}.$$

Then

$$\begin{aligned} \mathbf{w}_{k^*}^T \mathbf{x}_i &= \mathbf{x}_i^T (\mathbf{w}_{k^*} - \frac{\mathbf{x}_i - \mathbf{x}_{j_-^*}}{\|\mathbf{x}_i - \mathbf{x}_{j_-^*}\|}) + \mathbf{x}_i^T \frac{\mathbf{x}_i - \mathbf{x}_{j_-^*}}{\|\mathbf{x}_i - \mathbf{x}_{j_-^*}\|} \\ &\geq \frac{1}{2} \|\mathbf{x}_i - \mathbf{x}_{j_-^*}\| - 2\tau \geq \frac{\alpha(1 - \xi)}{2} - 2\tau. \end{aligned}$$

And

$$\begin{aligned} \mathbf{w}_{k^*}^T \mathbf{x}_{j_-^*} &= \mathbf{x}_{j_-^*}^T (\mathbf{w}_{k^*} - \frac{\mathbf{x}_i - \mathbf{x}_{j_-^*}}{\|\mathbf{x}_i - \mathbf{x}_{j_-^*}\|}) + \mathbf{x}_{j_-^*}^T \frac{\mathbf{x}_i - \mathbf{x}_{j_-^*}}{\|\mathbf{x}_i - \mathbf{x}_{j_-^*}\|} \\ &\leq -\frac{1}{2} \|\mathbf{x}_i - \mathbf{x}_{j_-^*}\| + 2\tau \leq -\frac{\alpha(1 - \xi)}{2} + 2\tau. \end{aligned}$$

By setting  $\tau = \frac{\alpha(1-\xi)}{8}$ , we see that

$$\tanh(\gamma \mathbf{w}_{k^*}^T \mathbf{x}_i) \left( \text{sign} \left( \mathbf{w}_{k^*}^T \mathbf{x}_i \right) - \text{sign} \left( \mathbf{w}_{k^*}^T \mathbf{x}_{j^*} \right) \right) \geq \frac{\gamma \alpha (1 - \xi)}{4}$$

Therefore, as long as  $\gamma \geq \frac{4(\nu+\alpha)}{\alpha(1-\xi)}$ , we have  $\mathbb{1}[y_i \tilde{f}_{\tilde{W}, \tilde{B}}(\mathbf{x}_i) < \alpha] = 0$  for all  $\mathbf{x}_i \in \tilde{S}$ , and Eq. (30) holds.

Finally by combining Eq. (28), Eq. (29) and Eq. (30), we have Eq. (24d)  $\leq 0$ . This completes the proof.  $\square$

## A.6 Proof of Lemma 4

*Proof.* Since  $f_{2\alpha}^*$  is independent of  $\mathbf{x}_i$  and  $0 \leq \Phi \leq 1$ , by Hoeffding bound, w.p.  $1 - 2e^{-2\beta N t^2}$

$$|\hat{\mathbb{E}}[\Phi(y f_{2\alpha}^*(\mathbf{x}))] - \mathbb{E}[\Phi(y f_{2\alpha}^*(\mathbf{x}))]| \leq t \quad (33)$$

$\square$

## A.7 Proof of Lemma 6

*Proof.*

$$\begin{aligned} & |\tilde{f}_{W^*, B^*}(\mathbf{x}) - f_{W^*, B^*}(\mathbf{x})| \\ & \leq \max_{j \in B^-} \left( |\tanh(\gamma W^* \mathbf{x})^T \mathbf{b}_j^* - \text{sign}(W^* \mathbf{x})^T \mathbf{b}_j^*| \right) \\ & \quad + \max_{j \in B^+} \left( |\tanh(\gamma W^* \mathbf{x})^T \mathbf{b}_j^* - \text{sign}(W^* \mathbf{x})^T \mathbf{b}_j^*| \right) \\ & \leq 2 \max_{j \in B} \left( |\tanh(\gamma W^* \mathbf{x})^T \mathbf{b}_j^* - \text{sign}(W^* \mathbf{x})^T \mathbf{b}_j^*| \right) \\ & \leq 4r \max_{k \in [r]} |\tanh(\gamma \mathbf{w}_k^{*T} \mathbf{x}) - \text{sign}(\mathbf{w}_k^{*T} \mathbf{x})| \end{aligned}$$

Given Assumption 1, we have w.p. at least  $1 - c_1 r \theta$ ,  $|\mathbf{w}_k^{*T} \mathbf{x}| \geq \theta$  for all  $k \in [r]$  and

$$|\tanh(\gamma \mathbf{w}_k^{*T} \mathbf{x}) - \text{sign}(\mathbf{w}_k^{*T} \mathbf{x})| \leq 2e^{-2\gamma\theta}$$

$\square$
